# Supplementary material
Source: PubMed Central journal article supplement (PMC4867164)
Supplement: NIHMS775638-supplement-Supplement1.pdf [file NIHMS775638-supplement-Supplement1.pdf]

## Supplementary Appendix

This appendix has been provided by the authors to give readers additional information about their work.

Supplement to: Schiff M, Veauville-Merlié A, Acquaviva-Bourdain C, et al. *SLC25A32* mutations and riboflavin-responsive exercise intolerance. *N Engl J Med* 2016;374:795-7. DOI: 10.1056/NEJMc1513610

## **SUPPLEMENTAL APPENDIX**

# **Mitochondrial FAD transporter mutations and riboflavin-responsive exercise intolerance**

### **TABLE OF CONTENTS**

|               |          |
|---------------|----------|
| <b>Figure</b> | <b>2</b> |
| <b>Legend</b> | <b>3</b> |

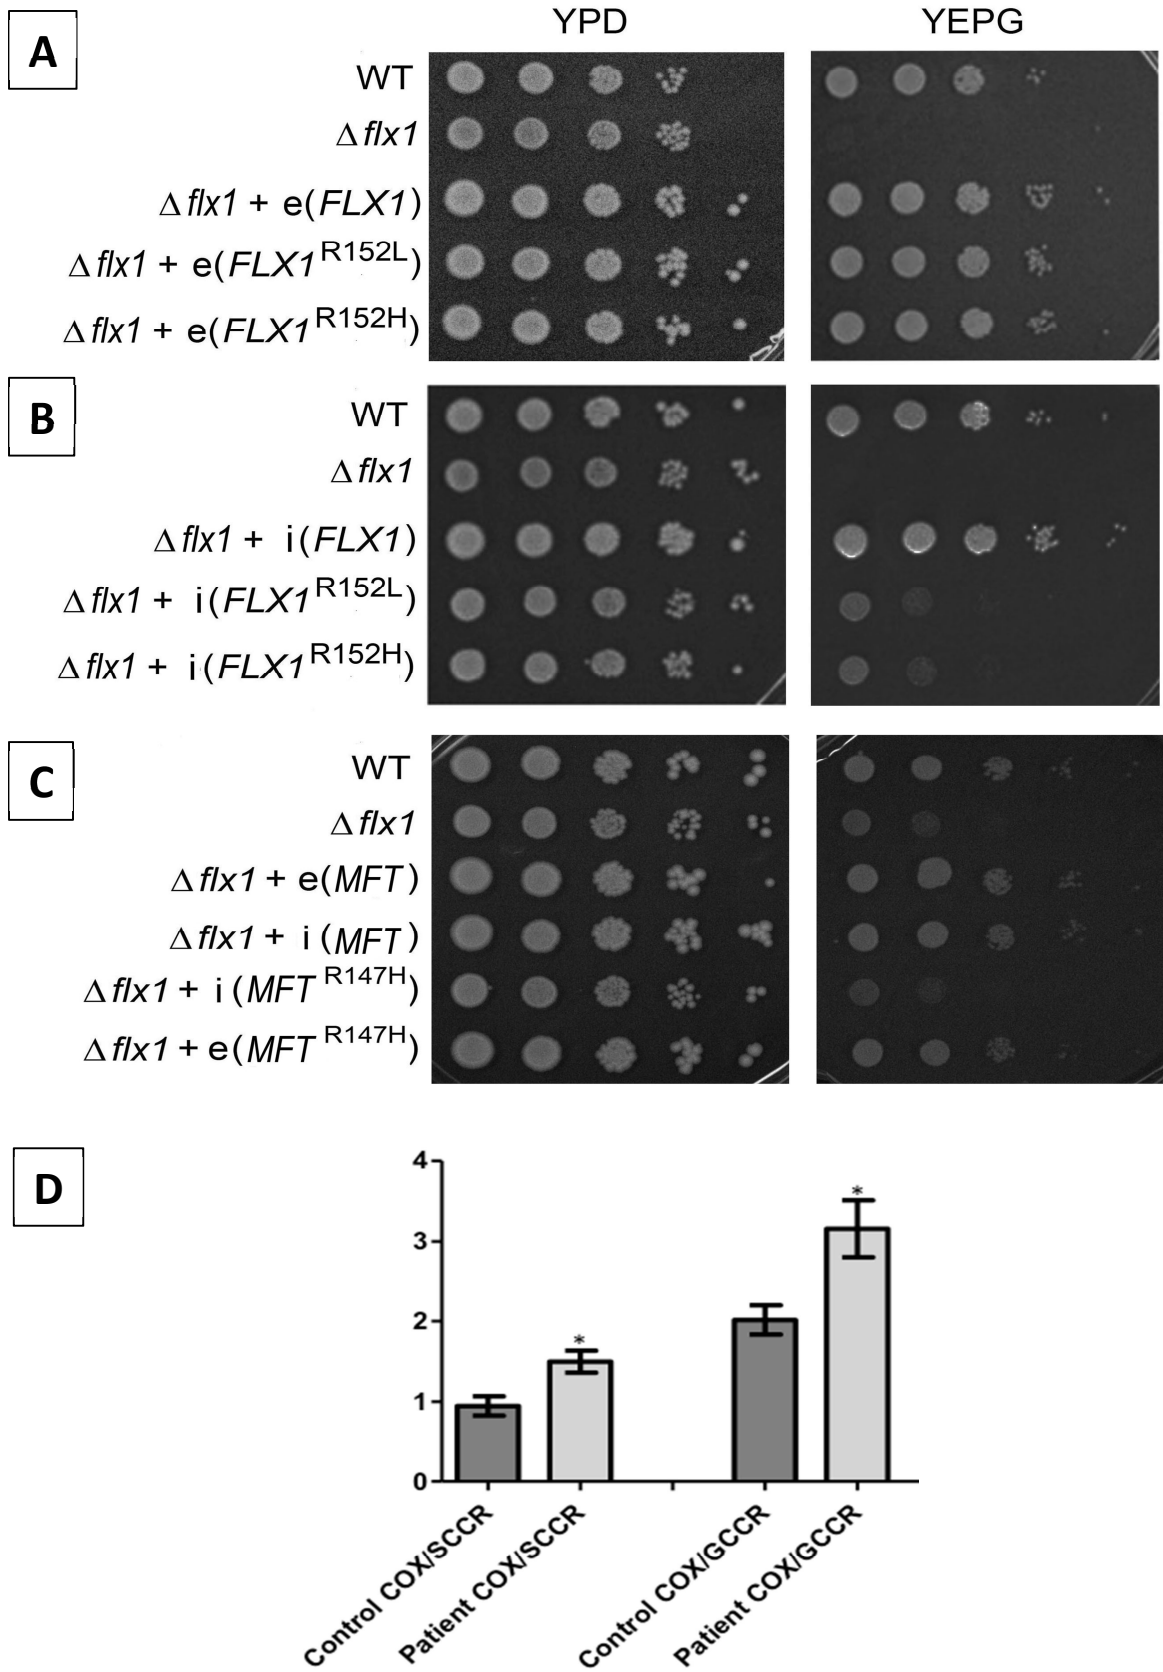

**FIGURE S1:** Evidence for the deleterious impact of the *SLC25A32* mutations on yeast growth and mitochondrial flavoproteins

## **LEGEND**

**A to C: Yeast studies.** The wild type strain (WT), the *flx1* null mutant ( $\Delta flx1$ ) and the *flx1* mutant transformed with either the wild type gene ( $\Delta flx1 + FLX1$ ), the R152H or the R152L mutation (this other substitution, R152L was introduced to assess the effect of a non-charged hydrophobic residue) on a high copy plasmid (prefix e in B) or integrated into chromosomal DNA (prefix i in A) were grown in rich glucose to early stationary phase. The cultures were serially diluted and equal volumes spotted on rich glucose (YPD) and rich glycerol/ethanol (YEPG) plates. The *flx1* mutant was also transformed with the *SLC25A32* cDNAs for the wild type and the R147H human FAD transporter (MFT), either in multicopy or integrative plasmids (panel C).

**D: Activities of FAD-dependent mitochondrial enzymes succinate dehydrogenase (SDH) and glycerol-3-phosphate dehydrogenase (G3PDH) in *SLC25A32*-deficient fibroblasts.** Compared to COX (cytochrome *c* oxidase) activity, the two FAD-dependent activities, SCCR (succinate cytochrome *c* reductase, representative of the SDH activity) and GCCR (G3P cytochrome *c* reductase, representative of G3PDH activity) activities appeared significantly decreased, resulting in a 50% higher ratio of COX/SCCR and COX/GCCR. Values are means  $\pm$  SEM (n=4 for each cell type); \*:  $P < 0.05$ .
